# Supplementary material for: Metabolic-suppressed cancer-associated fibroblasts limit the immune environment and survival in colorectal cancer with liver metastasis
Source: Front Pharmacol. 2023 Aug 31;14:1212420. doi: 10.3389/fphar.2023.1212420 (PMC10501863; doi:10.3389/fphar.2023.1212420)
Supplement: Supplementary file 1 [file Table2.XLSX]

## Sheet: Sheet1
	p_val	avg_log2FC	pct.1	pct.2	p_val_adj	cluster	gene
D-Arginine and D-ornithine metabolism	1.55717e-212	0.0301642	0	0	1.32359e-210	0	D-Arginine and D-ornithine metabolism
Caffeine metabolism	2.24677e-181	0.0337317	0.007	0.039	1.90976e-179	0	Caffeine metabolism
Lipoic acid metabolism	6.15259e-94	0.0425099	1	1	5.2297e-92	0	Lipoic acid metabolism
Biotin metabolism	6.72888e-81	0.0081171	1	0.881	5.71955e-79	0	Biotin metabolism
Retinol metabolism	6.2064e-43	0.0199615	1	1	5.27544e-41	0	Retinol metabolism
Linoleic acid metabolism	2.20689e-32	0.0190942	0.804	0.48	1.87586e-30	0	Linoleic acid metabolism
Steroid hormone biosynthesis	5.46074e-10	0.00872852	1	1	4.64163e-08	0	Steroid hormone biosynthesis
Ascorbate and aldarate metabolism	2.79087e-07	0.0118883	1	1	2.37224e-05	0	Ascorbate and aldarate metabolism
Mannose type O-glycan biosynthesis	9.63578e-06	0.00958366	1	1	0.000819041	0	Mannose type O-glycan biosynthesis
Glycolysis / Gluconeogenesis	1.24332e-167	0.102628	1	0.998	1.05682e-165	1	Glycolysis / Gluconeogenesis
Pyrimidine metabolism	2.91855e-155	0.104634	1	1	2.48077e-153	1	Pyrimidine metabolism
Oxidative phosphorylation	8.47101e-155	0.192268	1	0.997	7.20035e-153	1	Oxidative phosphorylation
Purine metabolism	4.49612e-152	0.0711496	1	1	3.8217e-150	1	Purine metabolism
N-Glycan biosynthesis	2.8141e-147	0.108444	1	1	2.39198e-145	1	N-Glycan biosynthesis
Glutathione metabolism	6.11391e-145	0.0862589	1	1	5.19682e-143	1	Glutathione metabolism
Pyruvate metabolism	1.92442e-134	0.11079	1	0.891	1.63576e-132	1	Pyruvate metabolism
Amino sugar and nucleotide sugar metabolism	8.01462e-132	0.091784	1	1	6.81243e-130	1	Amino sugar and nucleotide sugar metabolism
Valine, leucine and isoleucine degradation	3.53984e-125	0.0836243	1	1	3.00886e-123	1	Valine, leucine and isoleucine degradation
Citrate cycle (TCA cycle)	4.9775e-123	0.13351	1	1	4.23087e-121	1	Citrate cycle (TCA cycle)
Drug metabolism - other enzymes	8.06247e-123	0.0625937	1	1	6.8531e-121	1	Drug metabolism - other enzymes
Arginine and proline metabolism	6.89338e-121	0.0899676	0.902	0.436	5.85938e-119	1	Arginine and proline metabolism
Cysteine and methionine metabolism	4.85308e-120	0.0898107	0.995	0.818	4.12511e-118	1	Cysteine and methionine metabolism
Sphingolipid metabolism	1.99796e-114	0.0800145	0.645	0.149	1.69826e-112	1	Sphingolipid metabolism
Fatty acid degradation	9.45477e-114	0.0846002	1	1	8.03655e-112	1	Fatty acid degradation
Glycosaminoglycan degradation	5.16424e-111	0.118317	1	1	4.38961e-109	1	Glycosaminoglycan degradation
Pentose phosphate pathway	4.03638e-108	0.105363	1	1	3.43092e-106	1	Pentose phosphate pathway
Glycerophospholipid metabolism	3.50635e-107	0.0517125	0.953	0.753	2.9804e-105	1	Glycerophospholipid metabolism
Propanoate metabolism	5.07825e-107	0.0890739	0.997	0.997	4.31651e-105	1	Propanoate metabolism
Arachidonic acid metabolism	5.06965e-105	0.0627341	0.907	0.499	4.3092e-103	1	Arachidonic acid metabolism
Fructose and mannose metabolism	8.88558e-102	0.0903199	0.998	0.941	7.55274e-100	1	Fructose and mannose metabolism
Glyoxylate and dicarboxylate metabolism	2.38262e-101	0.0998747	1	1	2.02523e-99	1	Glyoxylate and dicarboxylate metabolism
Glycosphingolipid biosynthesis - globo and isoglobo series	1.35962e-99	0.142699	0.363	0.039	1.15568e-97	1	Glycosphingolipid biosynthesis - globo and isoglobo series
beta-Alanine metabolism	2.2671e-98	0.0830247	0.861	0.456	1.92703e-96	1	beta-Alanine metabolism
Glycosylphosphatidylinositol (GPI)-anchor biosynthesis	8.68863e-95	0.0975772	0.993	0.997	7.38534e-93	1	Glycosylphosphatidylinositol (GPI)-anchor biosynthesis
Lysine degradation	2.3908e-92	0.0589898	1	1	2.03218e-90	1	Lysine degradation
Fatty acid elongation	2.95962e-92	0.0877619	1	1	2.51568e-90	1	Fatty acid elongation
Galactose metabolism	4.73971e-86	0.0762966	1	1	4.02876e-84	1	Galactose metabolism
Other glycan degradation	6.50308e-85	0.0892715	1	1	5.52762e-83	1	Other glycan degradation
Glycosphingolipid biosynthesis - ganglio series	1.32009e-80	0.0966351	1	1	1.12208e-78	1	Glycosphingolipid biosynthesis - ganglio series
Ether lipid metabolism	1.39148e-80	0.0522624	0.899	0.555	1.18276e-78	1	Ether lipid metabolism
Tryptophan metabolism	7.70479e-76	0.0519809	1	1	6.54907e-74	1	Tryptophan metabolism
Histidine metabolism	1.69659e-75	0.0749846	0.247	0.024	1.4421e-73	1	Histidine metabolism
Tyrosine metabolism	1.87546e-70	0.0648064	0.652	0.265	1.59414e-68	1	Tyrosine metabolism
Folate biosynthesis	1.32779e-63	0.0680332	0.998	1	1.12862e-61	1	Folate biosynthesis
Biosynthesis of unsaturated fatty acids	1.36328e-63	0.0789192	1	1	1.15879e-61	1	Biosynthesis of unsaturated fatty acids
Glycerolipid metabolism	4.58308e-61	0.0325504	1	1	3.89562e-59	1	Glycerolipid metabolism
Glycosaminoglycan biosynthesis - chondroitin sulfate / dermatan sulfate	9.76206e-61	0.0807555	0.995	1	8.29775e-59	1	Glycosaminoglycan biosynthesis - chondroitin sulfate / dermatan sulfate
Nicotinate and nicotinamide metabolism	1.55775e-60	0.0561714	1	1	1.32408e-58	1	Nicotinate and nicotinamide metabolism
Riboflavin metabolism	2.56065e-53	0.153394	0.977	0.998	2.17655e-51	1	Riboflavin metabolism
Glycine, serine and threonine metabolism	4.85906e-53	0.0436304	0.848	0.576	4.1302e-51	1	Glycine, serine and threonine metabolism
Ubiquinone and other terpenoid-quinone biosynthesis	2.7994e-51	0.117398	0.655	0.375	2.37949e-49	1	Ubiquinone and other terpenoid-quinone biosynthesis
Neomycin, kanamycin and gentamicin biosynthesis	6.51998e-42	0.00184657	1	1	5.54198e-40	1	Neomycin, kanamycin and gentamicin biosynthesis
Sulfur metabolism	1.74886e-41	0.199461	0.52	0.234	1.48653e-39	1	Sulfur metabolism
Metabolism of xenobiotics by cytochrome P450	2.92333e-40	0.0247398	1	1	2.48483e-38	1	Metabolism of xenobiotics by cytochrome P450
Taurine and hypotaurine metabolism	6.32692e-36	0.10654	0.417	0.102	5.37788e-34	1	Taurine and hypotaurine metabolism
Phenylalanine metabolism	6.82379e-36	0.0794779	0.041	0.002	5.80022e-34	1	Phenylalanine metabolism
Terpenoid backbone biosynthesis	2.97251e-34	0.0440309	1	1	2.52664e-32	1	Terpenoid backbone biosynthesis
Other types of O-glycan biosynthesis	1.52621e-28	0.0472774	1	1	1.29728e-26	1	Other types of O-glycan biosynthesis
Porphyrin and chlorophyll metabolism	5.67736e-25	0.0265427	1	1	4.82576e-23	1	Porphyrin and chlorophyll metabolism
Butanoate metabolism	7.93348e-23	0.0260591	1	1	6.74345e-21	1	Butanoate metabolism
Phenylalanine, tyrosine and tryptophan biosynthesis	5.71129e-22	0.0928654	0.062	0.004	4.8546e-20	1	Phenylalanine, tyrosine and tryptophan biosynthesis
Starch and sucrose metabolism	6.83717e-22	0.0280668	1	1	5.81159e-20	1	Starch and sucrose metabolism
One carbon pool by folate	3.71181e-20	0.0485243	0.712	0.425	3.15504e-18	1	One carbon pool by folate
Inositol phosphate metabolism	2.36137e-19	0.0204618	0.531	0.328	2.00717e-17	1	Inositol phosphate metabolism
Selenocompound metabolism	2.04402e-18	0.0440665	1	1	1.73742e-16	1	Selenocompound metabolism
Primary bile acid biosynthesis	4.6351e-17	0.0408988	0.992	1	3.93984e-15	1	Primary bile acid biosynthesis
Alanine, aspartate and glutamate metabolism	2.53807e-16	0.0228655	1	1	2.15736e-14	1	Alanine, aspartate and glutamate metabolism
Glycosaminoglycan biosynthesis - keratan sulfate	1.352e-10	0.032084	1	1	1.1492e-08	1	Glycosaminoglycan biosynthesis - keratan sulfate
Valine, leucine and isoleucine biosynthesis	3.16378e-10	0.128214	0.168	0.076	2.68921e-08	1	Valine, leucine and isoleucine biosynthesis
Glycosphingolipid biosynthesis - lacto and neolacto series	9.45778e-10	0.0168248	0.714	0.592	8.03911e-08	1	Glycosphingolipid biosynthesis - lacto and neolacto series
Steroid biosynthesis	1.04266e-08	0.0257004	0.855	0.976	8.86265e-07	1	Steroid biosynthesis
Pantothenate and CoA biosynthesis	1.10409e-08	0.0285147	0.917	0.998	9.38479e-07	1	Pantothenate and CoA biosynthesis
Mucin type O-glycan biosynthesis	1.31984e-07	0.0168825	0.926	1	1.12187e-05	1	Mucin type O-glycan biosynthesis
Glycosaminoglycan biosynthesis - heparan sulfate / heparin	1.18532e-05	0.0147308	1	1	0.00100752	1	Glycosaminoglycan biosynthesis - heparan sulfate / heparin
Arginine biosynthesis	6.77177e-05	0.0149768	0.873	0.96	0.005756	1	Arginine biosynthesis
Phosphonate and phosphinate metabolism	0.000118374	0.096056	0.995	1	0.0100618	1	Phosphonate and phosphinate metabolism
Fatty acid biosynthesis	0.00647727	0.0257148	0.109	0.039	0.550568	1	Fatty acid biosynthesis
Vitamin B6 metabolism	0.00947791	0.0878822	0.397	0.139	0.805623	1	Vitamin B6 metabolism
